# Supplementary material
Source: publisher figshare collection journal article supplement (https://gsapubs.figshare.com/articles/dataset/_/12542186)
Supplement: Supplementary file 1 [file 1]

1 **GSA Data Repository 2020008**

2  
3 Calcium isotope evidence for environmental variability before and across the Cretaceous –  
4 Paleogene mass extinction  
5 *Linzmeier et al.*  
6  
7

8 This Data Repository entry contains:

---

9 • Supplementary Figures

- 10 ○ Figure DR1 – All  $\delta^{44/40}\text{Ca}$  through section  
11 ○ Figure DR2 – Comparison of  $\delta^{44/40}\text{Ca}$  to  $\text{Wt}\%_{\text{carb}}$  from ODP 690  
12 ○ Figure DR3 – Comparison of  $\delta^{44/40}\text{Ca}$  to elemental ratios  
13 ○ Figure DR4 –  $\delta^{44/40}\text{Ca}_{\text{SW}}$  sensitivity to global change in  $\Delta^{44/40}\text{Ca}_{\text{carb-SW}}$

14 • Supplementary Tables

- 15 ○ Table DR1 – Sample list and museum information  
16 ○ Table DR2 – Seymour Island age model tie points  
17 ○ Table DR3 – Global age model tie points  
18 ○ Table DR4 – Trace element and  $\delta^{44/40}\text{Ca}$  dataset [*found in external Excel file*]  
19 ○ Table DR5 –  $^{87}\text{Sr}/^{86}\text{Sr}$  dataset [*found in external Excel file*]  
20 ○ Table DR6 – Summary statistics of replicates  
21 ○ Table DR7 – Range of calcium concentrations for the Late Cretaceous  
22 ○ Table DR8 – Flux balance model parameters

23 • Supplementary Discussion

- 24 ○ Extended description of geological setting  
25 ○ Extended analytical methods  
26 ○ Description of age model and correlation  
27 ○ Description of forward model  
28 ○ Discussion of calcium isotope fractionation and biomineralization

29 • Supplementary References

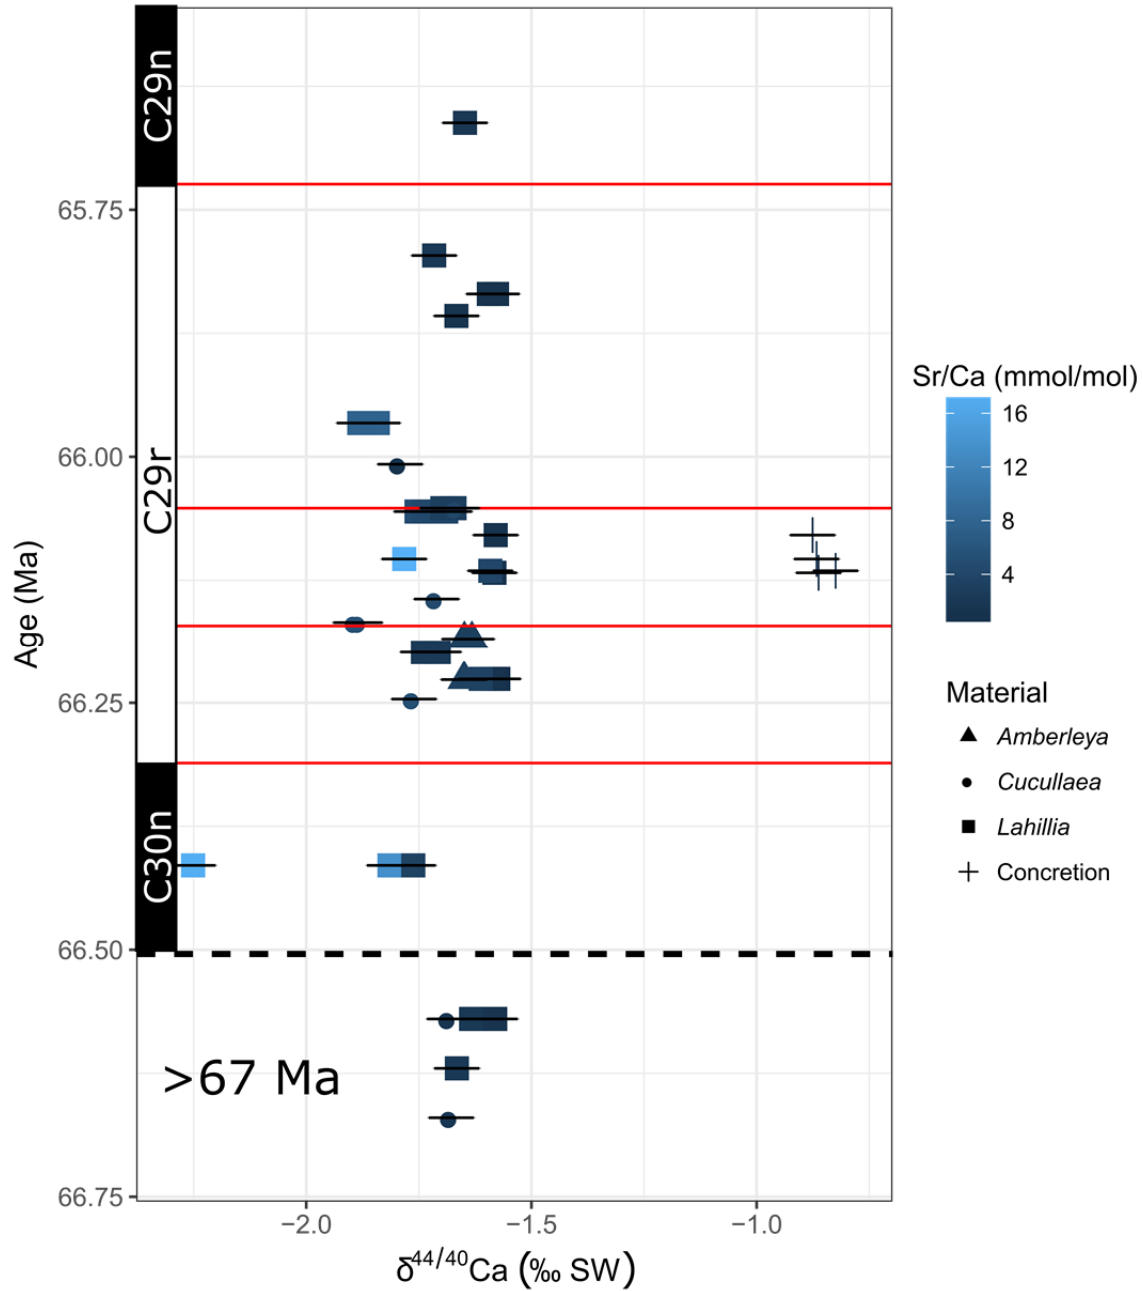

### Data Repository Figure DR1. All $\delta^{44/40}\text{Ca}$ through section

All analyses of  $\delta^{44/40}\text{Ca}$  through time at Seymour Island. Shells with high Sr/Ca and analyses of carbonate cement are excluded from Figure 3 in the main text. Note that shells with high Sr/Ca have lower  $\delta^{44/40}\text{Ca}$  compared to closely contemporaneous samples. Concretion carbonate cement has consistent  $\delta^{44/40}\text{Ca}$  near -0.8‰ across several samples, which may reflect the difference between biogenic aragonite and inorganic calcite (Blättler et al., 2012). The three red bars from bottom to top indicate the start of Deccan Traps volcanism, a putative local extinction, and the K-Pg extinction, respectively.

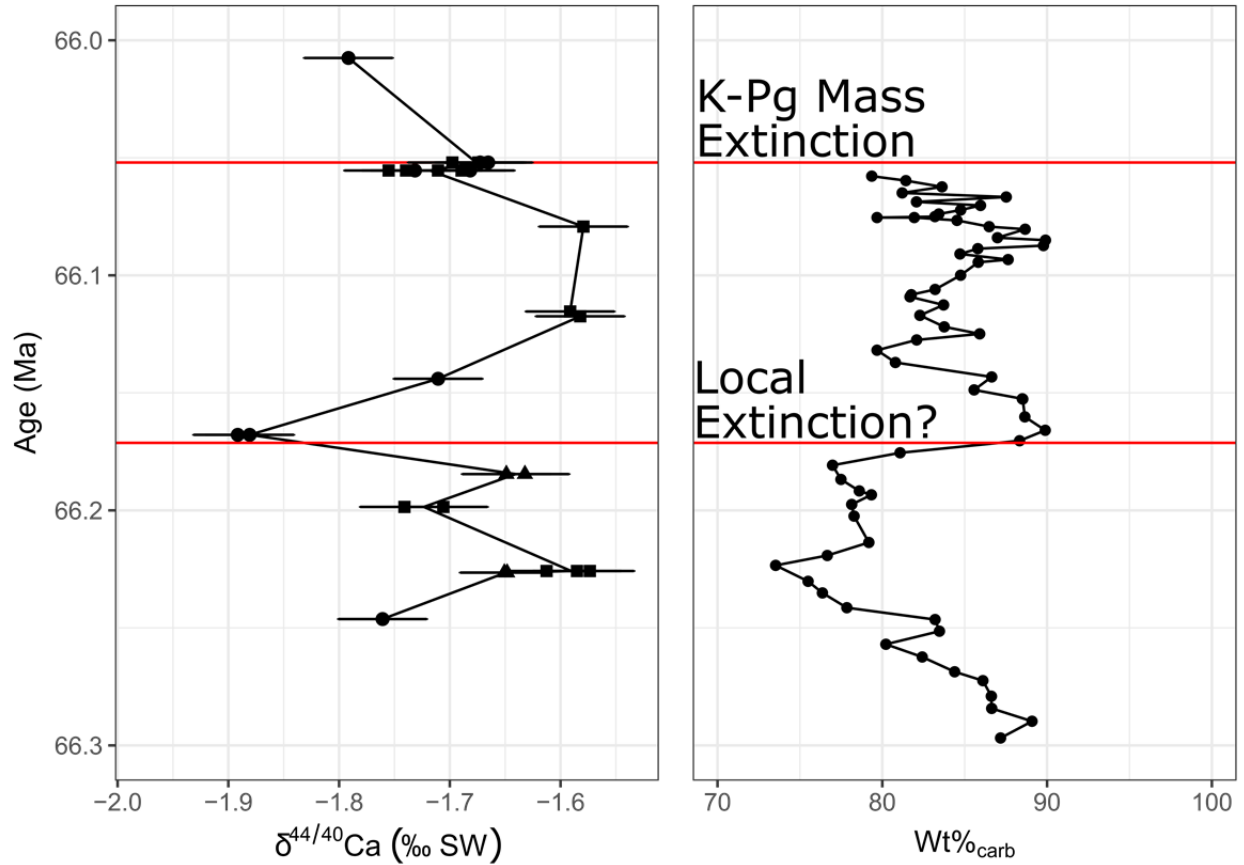

**Data Repository Figure DR2. Comparison of  $\delta^{44/40}\text{Ca}$  to  $\text{Wt}\%_{\text{carb}}$  from ODP 690**

Bivalve  $\delta^{44/40}\text{Ca}$  from low Sr/Ca samples near to the K-Pg boundary compared to variability in  $\text{Wt}\%_{\text{carb}}$  measured at ODP 690. Correlation based on the K-Pg boundary and 30N-29R reversal horizon with linear age interpolations between these horizons; see below for more specifics. The  $\text{Wt}\%_{\text{carb}}$  record from this site (Maud Rise) reflects both saturation state and carbonate production in the high latitude ocean (O'Connell, 1990; Ehrendorfer, 1993; Henahan et al., 2016). Modern high latitude oceans are likely more sensitive to saturation state change (Fabry et al., 2009). The slight decrease in  $\text{Wt}\%_{\text{carb}}$  below the K-Pg may be due to bioturbation (Henahan et al., 2016). Local minor extinction horizon from Tobin (2017).

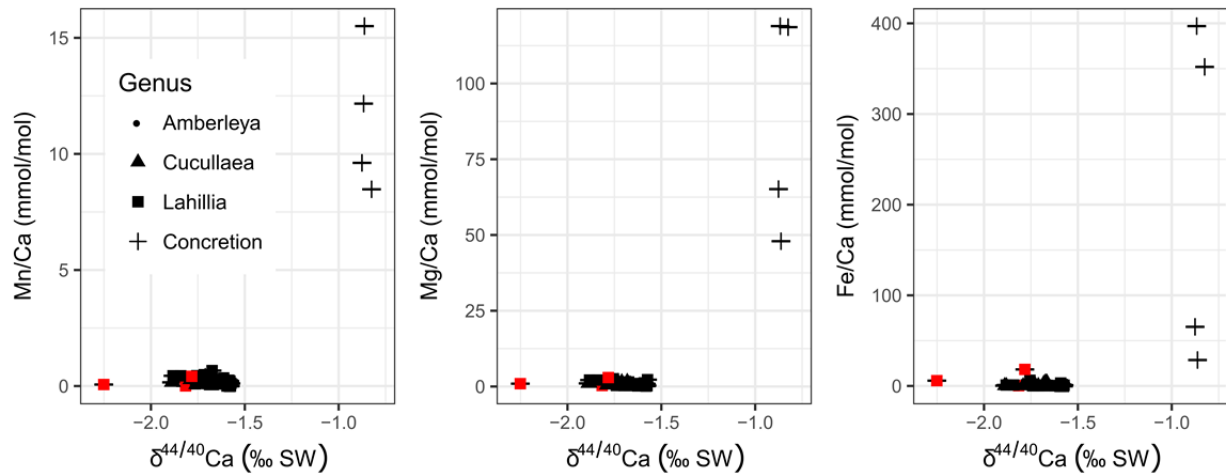

### Data Repository Figure DR3. Comparison of $\delta^{44/40}\text{Ca}$ to elemental ratios

All analyses of  $\delta^{44/40}\text{Ca}$  vs other elemental ratios measured by ICP-OES. Shells with Sr/Ca higher than 10 (mmol/mol) are highlighted in red. For most solutions the [Mn], [Mg], and [Fe] were below calibration range for solutions optimized for Ca and Sr concentrations. These data highlight the difference between shell material and concretion carbonate cement. The low Mn/Ca, Mg/Ca, and Fe/Ca also supports the preservation of unaltered shell.

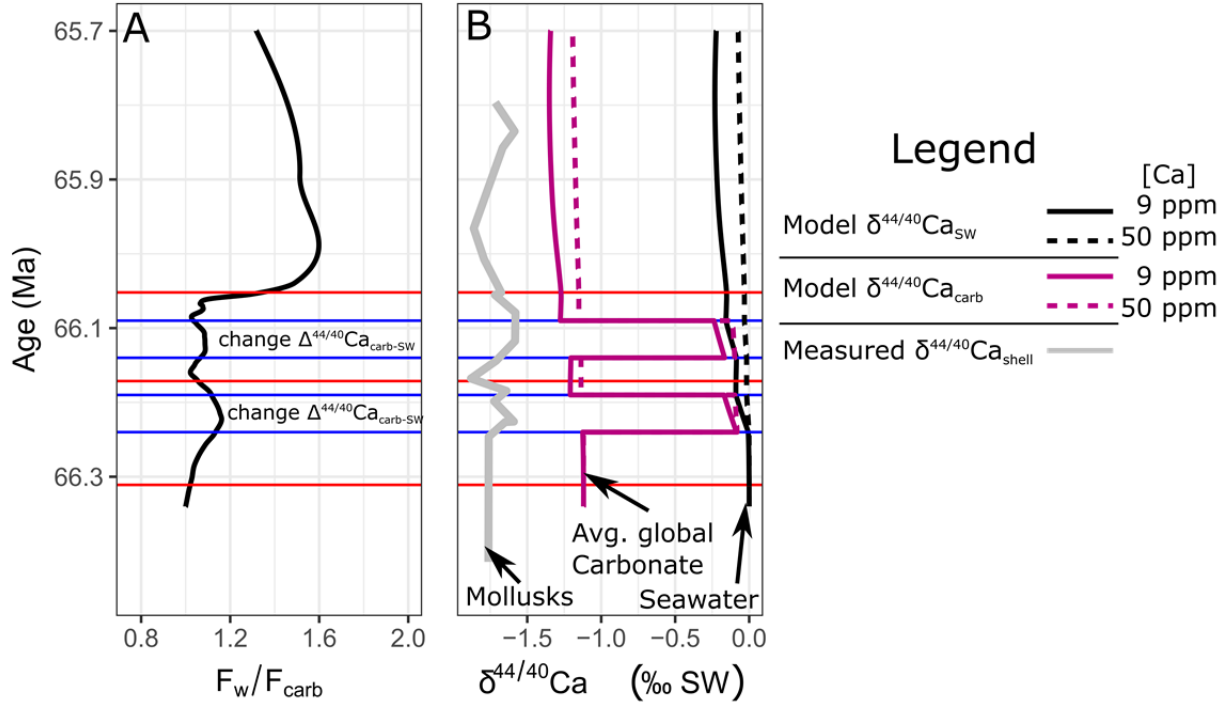

61

62 **Data Repository Figure DR4.  $\delta^{44/40}\text{Ca}_{\text{SW}}$  sensitivity to global change in both flux imbalance**  
 63 **and  $\Delta^{44/40}\text{Ca}_{\text{carb-SW}}$**

64 A) Flux estimates are based on scaling the burial flux of carbonate ( $F_{\text{carb}}$ ) using  $Wt\%_{\text{carb}}$  at ODP  
 65 690 assuming constant weathering flux ( $F_w$ ). The magnitude of the global carbonate fractionation  
 66 factor ( $\Delta^{44/40}\text{Ca}_{\text{carb-SW}}$ ) is reduced by 1.0‰ between the pairs of blue lines and then returns to the  
 67 previous value (-1.12‰) outside of these lines. B) Modeled  $\delta^{44/40}\text{Ca}_{\text{SW}}$  and  $\delta^{44/40}\text{Ca}_{\text{carb}}$  at two  
 68 [Ca] through time compared to the measured  $\delta^{44/40}\text{Ca}_{\text{shell}}$ . Even with large (~1.0‰) stepwise  
 69 change to the global fractionation factor (between the blue lines), minimal  $\delta^{44/40}\text{Ca}_{\text{SW}}$  change  
 70 (<0.02‰) for the global ocean occurs over the timescale studied.

71 **Data Repository Table DR1. Sample List and Museum Information**

| <b>Sample</b> | <b>Museum*</b> | <b>Museum #</b> | <b>Class</b> | <b>Genus</b>                                                   |
|---------------|----------------|-----------------|--------------|----------------------------------------------------------------|
| C1174A.2      | UM             |                 | Bivalvia     | <i>Cucullaea</i>                                               |
| C1184A2       | UM             |                 | Bivalvia     | <i>Cucullaea</i>                                               |
| C1467A        | UM             |                 | Bivalvia     | <i>Cucullaea</i>                                               |
| C1517A        | UM             |                 | Bivalvia     | <i>Cucullaea</i>                                               |
| C1555B        | UM             |                 | Bivalvia     | <i>Cucullaea</i>                                               |
| C477B         | UM             |                 | Bivalvia     | <i>Cucullaea</i>                                               |
| C757B         | UM             |                 | Bivalvia     | <i>Cucullaea</i>                                               |
| C757C2        | UM             |                 | Bivalvia     | <i>Cucullaea</i>                                               |
| C915A.2       | UM             |                 | Bivalvia     | <i>Cucullaea</i>                                               |
| JRB-16-0351   | UW             | UWBM-109960     | Bivalvia     | <i>Lahillia</i>                                                |
| JRB-16-0729   | UW             | UWBM-109958     | Bivalvia     | <i>Lahillia</i>                                                |
| JRB-16-0877   | UW             | UWBM-109964     | Bivalvia     | <i>Lahillia</i>                                                |
| JRB-16-0330   | UW             | UWBM-109965     | Bivalvia     | <i>Lahillia</i>                                                |
| L1134A        | UM             |                 | Bivalvia     | <i>Lahillia</i>                                                |
| L1161B        | UM             |                 | Bivalvia     | <i>Lahillia</i>                                                |
| L1161Sed      | UM             |                 | Sediment     | Sediment                                                       |
| L1430A1       | UM             |                 | Bivalvia     | <i>Lahillia</i>                                                |
| L1474A1       | UM             |                 | Bivalvia     | <i>Lahillia</i>                                                |
| L1480C        | UM             |                 | Bivalvia     | <i>Lahillia</i>                                                |
| L1480D        | UM             |                 | Bivalvia     | <i>Lahillia</i>                                                |
| L1516A        | UM             |                 | Bivalvia     | <i>Lahillia</i>                                                |
| L1516B        | UM             |                 | Bivalvia     | <i>Lahillia</i>                                                |
| L1516C        | UM             |                 | Bivalvia     | <i>Lahillia</i>                                                |
| L1529B        | UM             |                 | Bivalvia     | <i>Lahillia</i>                                                |
| L1529C        | UM             |                 | Bivalvia     | <i>Lahillia</i>                                                |
| L1609         | UM             |                 | Bivalvia     | <i>Lahillia</i>                                                |
| L477B         | UM             |                 | Bivalvia     | <i>Lahillia</i>                                                |
| L477D         | UM             |                 | Bivalvia     | <i>Lahillia</i>                                                |
| L757A         | UM             |                 | Bivalvia     | <i>Lahillia</i>                                                |
| L757C         | UM             |                 | Bivalvia     | <i>Lahillia</i>                                                |
| SI-11-466A-1  | UW             | UWBM-109966     | Gastropoda   | <i>Amberleya</i><br>( <i>Ambercyclus</i> ? Witts et al., 2016) |
| SI-11-528A-1  | UW             | UWBM-109967     | Gastropoda   | <i>Amberleya</i><br>( <i>Ambercyclus</i> ? Witts et al., 2016) |
| SI-11-570A-1  | UW             | UWBM-109968     | Bivalvia     | <i>Lahillia</i>                                                |
| SI-11-570S-2  | UW             | UWBM-109969     | Sediment     | Sediment                                                       |
| SI-11-624A-2  | UW             | UWBM-109970     | Bivalvia     | <i>Lahillia</i>                                                |
| SI-11-624S-1  | UW             | UWBM-109971     | Sediment     | Sediment                                                       |
| SI-11-722A-1  | UW             | UWBM-109972     | Bivalvia     | <i>Lahillia</i>                                                |
| SI-11-722S-1  | UW             | UWBM-109973     | Sediment     | Sediment                                                       |

72 \*Institution name: UW – University of Washington, UM – University of Michigan

73

74 **Data Repository Table DR2. Seymour Island age model tie points**

| <b>Tie Point</b> | <b>Stratigraphic Height (m)<br/>Tobin et al. 2012</b> | <b>Stratigraphic Height (m)<br/>Zinsmeister 2001</b> | <b>Age (Ma)</b> | <b>Reference</b>    |
|------------------|-------------------------------------------------------|------------------------------------------------------|-----------------|---------------------|
| 29R-29N          | 924                                                   | 1118                                                 | 65.724          | Sprain et al., 2018 |
| KPg Boundary     | 865                                                   | 1059                                                 | 66.052          | Sprain et al., 2018 |
| 30N-29R          | 789                                                   | 983                                                  | 66.311          | Sprain et al., 2018 |
| 30R-30N          | 607                                                   | 801                                                  | 68.196          | GTS 2012            |

75

76 **Data Repository Table DR3. Global age model tie points**

| <b>Tie Point</b> | <b>ODP 690<br/>Stratigraphic Height (m)<br/>Hamilton, 1990</b> | <b>ODP1209<br/>Age (Ma)<br/>Barnet et al., 2018</b> | <b>ODP1262<br/>Age (Ma)<br/>Henehan et al., 2016</b> | <b>ODP1262<br/>Age (Ma)<br/>Westerhold et al., 2008</b> |
|------------------|----------------------------------------------------------------|-----------------------------------------------------|------------------------------------------------------|---------------------------------------------------------|
| 29R-29N          | 247.55                                                         | 65.608                                              | -                                                    | 64.192                                                  |
| KPg Boundary     | 247.82                                                         | 66.022                                              | 66.04                                                | 65.28                                                   |
| 30N-29R          | 252.58                                                         | 66.407                                              | 66.398                                               | 65.625                                                  |
| 30R-30N          | -                                                              | -                                                   | -                                                    | -                                                       |

77

78 **Data Repository Table DR4. Trace element and  $\delta^{44/40}\text{Ca}$  dataset [See Excel sheet]**

79

80 **Data Repository Table DR5.  $^{87}\text{Sr}/^{86}\text{Sr}$  dataset [See Excel sheet]**

81

82 **Data Repository Table DR6. Summary statistics of replicates**

| <b>Replicate type</b> | <b>Average range*<br/><math>\delta^{44/40}\text{Ca}</math> (‰)</b> | <b>Number of samples</b> | <b>Number of analyses</b> |
|-----------------------|--------------------------------------------------------------------|--------------------------|---------------------------|
| Sample                | 0.0257                                                             | 10                       | 21                        |
| Horizon               | 0.0383                                                             | 11                       | 32                        |

83 \*Average maximum minus minimum value for replicate analyses as defined in the table.

84 **Data Repository Table DR7. Range of calcium concentration for the Late Cretaceous**

| <b>Residence time <math>\tau_{\text{Ca}}</math> (Myr)</b> | <b>Scale for <math>\tau_{\text{Ca}}</math></b> | <b>Reservoir size (mol)</b> | <b>[Ca] (mmol/kg)</b> | <b>Reference</b>                               |
|-----------------------------------------------------------|------------------------------------------------|-----------------------------|-----------------------|------------------------------------------------|
| 0.45                                                      | 1                                              | 1.44E+19                    | 6.00E-03              | Du Vivier et al., 2015                         |
| 1.27                                                      | 2.83                                           | 4.08E+19                    | 1.70E-02              | Horita et al., 2002                            |
| 0.68                                                      | 1.5                                            | 2.16E+19                    | 9.00E-03              | Lasaga et al., 1985; Wilkinson and Algeo, 1989 |
| 1.50                                                      | 3.34                                           | 4.80E+19                    | 2.00E-02              | Stanley and Hardie, 1998                       |
| 2.25                                                      | 5                                              | 7.20E+19                    | 3.00E-02              | Hardie, 1996                                   |
| 3.75                                                      | 8.34                                           | 1.20E+20                    | 5.00E-02              | Wallmann, 2001                                 |

85 **Data Repository Table DR8. Flux balance model parameters**

| Symbol         | Description                       | Value            | Reference                             |
|----------------|-----------------------------------|------------------|---------------------------------------|
| $F_w$          | Weathering input flux             | $3.2E+13$ mol/yr | Sum input flux Du Vivier et al., 2015 |
| $\delta_w$     | Weathering input isotope ratio    | -1.12‰           | Du Vivier et al., 2015                |
| $\Delta_c$     | Carbonate Fractionation factor    | -1.12‰           | Du Vivier et al., 2015                |
| $\delta_{swi}$ | Initial isotope ratio of seawater | 0.00‰            | Zhu and Macdougall, 1998              |

86  
87 **Supplementary Discussion: Full description of geological setting**

88 The López de Bertodano Formation (LBF) was deposited in the James Ross Basin during  
89 the Maastrichtian-Danian and predominantly comprises siliciclastic clays and silts with rarer  
90 sandy horizons. While the LBF has commonly been considered as deposited in an open-ocean  
91 facing shelf environment (Macellari, 1988), redox proxies have implied some degree of  
92 circulation restriction (Schoepfer et al., 2017). Carbonate concretions are common within the  
93 mudrock facies, and sandier beds often have calcareous cements. The upper 300 m of the section  
94 comprise bioturbated siltstones with occasional mappable glauconite-rich horizons capped by  
95 lags of mollusks and other fossils (Macellari, 1988; Olivero, 2012; Witts et al., 2015).  
96 Glauconite-rich horizons suggest sediment starvation and possibly record flooding surfaces  
97 formed in response to short-duration, low-amplitude sea level rises (Chafetz and Reid, 2000).  
98 Sharp boundaries above glauconitic layers may suggest shallower deposition with storm  
99 scouring. Mean sedimentation rates are estimated to be between 10 and 30 cm/kyr using  
100 dinoflagellate cyst and ammonite biostratigraphy, with comparison to magnetostratigraphy and  
101 the K-Pg boundary horizon (Witts et al., 2015). Magnetostratigraphically constrained  
102 sedimentation rates range from 10 to 20 cm/kyr (Tobin et al., 2012).

103 There is broad agreement on a deepening upward trend during the deposition of the LBF,  
104 but specific depth interpretations vary. Estimates of water depth for deposition of the upper LBF  
105 range from 100-200 m (Huber, 1988; Macellari, 1988); however, Crame et al. (2004) argued for  
106 deeper outer shelf conditions. The uppermost portion of the section containing samples analyzed  
107 in this study has a generally uniform sedimentology, which suggests no appreciable differences  
108 in water depth between the specimens (Crame et al., 2004). Despite a lack of sedimentological  
109 change, Macellari (1988) used paleoecological change to infer a regression roughly 50 m below  
110 the K-Pg boundary, which may instead be a biological event (Tobin, 2017).

111 Post-depositional alteration of the LBF appears minimal; the formation dips shallowly at  
112 10° to the southeast, and many mollusks are preserved with nacreous aragonite that maintains  
113 iridescence, indicating that temperatures remained below 60°C (Tobin et al., 2012). The absence  
114 of any smectite-illite clay transformation and the presence of apatite fission tracks also suggests  
115 low burial temperatures (<80°C) and shallow depths (Pirrie, 1994). This evidence, combined  
116 with published data, indicates that many shells from this location are well-preserved and suitable  
117 for application to paleoclimate and paleoenvironmental reconstructions (Tobin et al., 2012;  
118 Tobin and Ward, 2015; Petersen et al., 2016; Witts et al., 2018).  
119



## Supplementary Discussion: Extended analytical methods

### *Elemental concentrations*

Approximately 50 mg samples powdered by hand drilling or crushing chips were weighed into acid-cleaned centrifuge tubes and dissolved in ultrapure 5% HNO<sub>3</sub>. Outgassed CO<sub>2</sub> was released after ~10 minutes of dissolution, when most powder had dissolved. Centrifuge tubes containing mixtures were then placed on a rocker table overnight. The mixtures were centrifuged and passed through 0.45 µm filters to obtain stock solutions. An aliquot of each stock solution was diluted to an estimated 12 ppm [Ca] in 7 mL of 5% HNO<sub>3</sub>. Elemental concentrations were measured using a Thermo Scientific iCAP 6500 ICP-OES in the Aqueous Geochemistry Laboratory at Northwestern University. Standardization and instrument performance were checked with repeated measurements of NIST SRM 1643f.

### *Calcium isotope ratios (<sup>44</sup>Ca/<sup>40</sup>Ca)*

Stable calcium isotope ratios (<sup>44</sup>Ca/<sup>40</sup>Ca) were measured in the Radiogenic Isotope Clean Laboratory at Northwestern University using an optimized <sup>43</sup>Ca-<sup>42</sup>Ca double-spike TIMS technique (Lehn et al., 2013). Measurements were done using a Thermo-Scientific Multicollector Triton Thermal Ionization Mass Spectrometer equipped with 10<sup>11</sup> Ω amplifier resistors. All procedures employed ultrapure reagents. Total procedural blanks determined by isotope dilution averaged 29 ng of Ca (n = 8), which is negligible compared to the amount of Ca processed for isotopic analysis (50 µg).

Sample aliquots containing 50 µg of Ca were weighed into Teflon vials, spiked, and equilibrated at 60 °C overnight on a hotplate. Solutions were dried at 90 °C, and the residues were dissolved in 0.5 mL of 1.55N HCl. Calcium was separated from other elements by eluting samples through Teflon columns packed with Bio-Rad AG MP-50 cation exchange resin. The purified fractions were dried, reacted with 2 drops of 35% H<sub>2</sub>O<sub>2</sub> to oxidize organic compounds, reacted with 2 drops of 16N HNO<sub>3</sub> to convert Ca to nitrate form, and dried. The residues were dissolved in 0.4 µL of 8N HNO<sub>3</sub> and then split into 4 equal beads containing ~12 µg of Ca. A single bead was loaded onto outgassed, single Ta filament assemblies between thin parafilm “dams” spaced ~0.5 mm apart. The beads were dried slowly at 1.6 amps, and then 1.0 µL of 10% H<sub>3</sub>PO<sub>4</sub> was added before a final dry down at 3.5 amps.

In the mass-spectrometer, a 20V <sup>40</sup>Ca ion-beam was achieved after warm-up, and <sup>40</sup>Ca/<sup>42</sup>Ca, <sup>43</sup>Ca/<sup>42</sup>Ca, and <sup>43</sup>Ca/<sup>44</sup>Ca ratios were measured using a three-hop duty cycle having variable integration times. Amplifier biases were cancelled using amplifier rotation, and the <sup>41</sup>K beam was monitored to confirm that <sup>40</sup>K did not isobarically interfere with <sup>40</sup>Ca (<sup>40</sup>K/<sup>41</sup>K = 0.00174). Datasets comprising 120 scans were reduced using an iterative procedure. All runs were evaluated to ensure a steady or increasing <sup>40</sup>Ca beam, an increasing raw <sup>42</sup>Ca/<sup>40</sup>Ca fractionation pattern, and the absence of filament reservoir effects, which appear as “reverse-fractionation” in uncorrected ratios or residual trends in fractionation-corrected ratios. Changes in collector cup efficiency were monitored and accounted for by analyzing at least 6 Ocean Scientific International Ltd. (OSIL) seawater (SW) standards and 2 NIST 915b standards every 30 samples. All results are reported in delta notation relative to SW. The internal precision of the sample runs ranged from ±0.016‰ to ±0.027‰ (2SEM). During the period of study, repeated analyses of OSIL SW and NIST 915b yielded mean δ<sup>44/40</sup>Ca values of 0.00‰ ± 0.009‰ (2SEM, n = 37) and NIST -1.13 ± 0.016‰ (2SEM, n = 10). These results correspond to a short-term,

external reproducibility of  $\pm 0.05\%$  (2SD), which is the uncertainty adopted for the present study. As described in the main text, replicates of samples were better than  $\pm 0.05\%$ .

#### *Radiogenic strontium isotope ratios ( $^{87}\text{Sr}/^{86}\text{Sr}$ )*

Strontium isotope ratios ( $^{87}\text{Sr}/^{86}\text{Sr}$ ) were also measured in the Radiogenic Isotope Clean Laboratory at Northwestern University, following the TIMS procedure outlined in Andrews et al. (2016). Sample aliquots containing 100 ng of Sr were dried in Teflon vials, and the residues were dissolved in 8 M  $\text{HNO}_3$ . Strontium was separated from matrix elements by eluting samples through inverted pipet tips packed with Eichrom Sr-Spec resin. The purified fractions were dried, and the residues were dissolved in 1.5  $\mu\text{L}$  3 N  $\text{HNO}_3$ . The aliquots were loaded onto outgassed, single Re filament assemblies, together with 1  $\mu\text{L}$  of a  $\text{TaCl}_5$  activator solution, and dried at 1.0 amps before heating to  $\sim 2.2$  amps. In the mass-spectrometer, an 8V  $^{88}\text{Sr}$  ion-beam was achieved before collecting data in multi-dynamic mode for 120 duty cycles having a 4 s integration time. Measurements were made with amplifier rotation. The  $^{85}\text{Rb}$  beam was monitored to ensure that  $^{87}\text{Rb}$  did not isobarically interfere with  $^{87}\text{Sr}$  ( $^{87}\text{Rb}/^{85}\text{Rb} = 0.3856$ ). Instrumental mass fractionation was corrected by normalizing  $^{86}\text{Sr}/^{88}\text{Sr}$  ratios to 0.1194 using an exponential law. During the period of study, measurements of NBS 987 yielded an  $^{87}\text{Sr}/^{86}\text{Sr}$  of  $0.710252 \pm 0.000008$  (2SD,  $n=5$ ).

#### **Supplementary Discussion: Description of age model and correlation**

##### *Seymour Island Age model:*

The age model for many of the samples builds on the stratigraphic framework outlined by Zinsmeister (2001), where plane projection was used to place georeferenced samples distributed across the island onto a unified stratigraphic section. Several samples analyzed in this study were collected within a measured stratigraphic section (Tobin et al., 2012). Placement of samples from the Tobin et al. (2012) framework into the Zinsmeister (2001) framework was done by adding 194 m to the stratigraphic height. This same stratigraphic framework has been used for previous geochemical studies (Petersen et al., 2016) and the analysis of the K-Pg extinction (Wang and Marshall, 2004; Tobin, 2017). Stratigraphic thicknesses for Molluscan Units, as defined by Macellari (1988), are within  $\sim 4$  m between the Tobin et al. (2012) and Zinsmeister (2001) frameworks (Petersen et al., 2016). Analyses of  $\delta^{18}\text{O}$  and  $\delta^{13}\text{C}$  from samples in both frameworks are comparable (Tobin et al., 2012). Given fixed sedimentation rates,  $\pm 4$  m uncertainty is equivalent to age uncertainties of  $\sim 13$  to  $\sim 40$  kyr. It should also be noted that the relative ordering of samples is robust relative to the K-Pg horizon due to significant lithological changes and the high sedimentation rates in the location.

Numerical ages for the section are derived assuming constant rates of sediment accumulation between chron reversals and the K-Pg boundary. Magnetostrigraphic reversals (C30R-C30N-C29R-C29N) are documented in the López de Bertodano Formation (Tobin et al., 2012). The age of one sample (JRB-16-0877) from 11 m above the base of C29N is extrapolated assuming the same sedimentation rate. Ages used for these reversals are from Sprain et al. (2018) and Gradstein et al. (2012). The age used for the K-Pg boundary is 66.052 Ma (Sprain et al., 2018). Correlation to other globally distributed datasets are outlined in the following paragraphs, and Table DR2 provides a complete list of ages used for the age model construction.

*Correlation to ODP 690:*

Data from ODP 690 are correlated to Seymour Island using chron reversals and the K-Pg boundary. The positions of chron reversals are from Hamilton (1990). Data on carbonate weight % are from several sources (O’Connell, 1990; Ehrendorfer, 1993). Some bioturbation near the K-Pg boundary may have produced a pre-impact decrease in carbonate weight percent due to moving carbonate up and non-carbonates lower in the core (Henehan et al., 2016), but perhaps the decrease is real and related to an increase in Deccan volcanism just before the K-Pg boundary (Ehrendorfer, 1993; Westerhold et al., 2011; Henehan et al., 2016; Dameron et al., 2017; Schoene et al., 2019; Sprain et al., 2019). For the purposes of the null hypothesis model based on flux imbalances (see below), the impact of this bioturbation is minimal and only matters slightly for low seawater calcium concentrations.

*Correlation to ODP 1262:*

Data from ODP 1262, as presented in Barnet et al. (2018), were correlated to the Seymour Island section by adjusting all data based on a slightly different K-Pg boundary age of 66.052 Ma (Sprain et al., 2018) rather than the astronomically tuned age of 66.02 Ma (Dinarès-Turell et al., 2014) used by Barnet et al. (2018). We also tie the C30N-C29R and C29R-C29N reversal ages to that from Sprain et al. (2018) and linearly scale astronomically tuned numeric ages between the two. Similar correlations to this dataset have been done recently by other authors (Schoene et al., 2019; Sprain et al., 2019). It should also be noted that the sedimentation rates differ greatly between 1 – 2 cm/kyr at ODP sites and 10 – 30 cm/kyr at Seymour Island.

*Correlation to ODP 1209:*

Data from ODP 1209, as presented in Westerhold et al. (2011) and Henehan et al. (2016), are correlated to our section by adjusting the ages of the K-Pg, C30N-C29R, and C29R-C29N to updated ages from Sprain et al. (2018) and scaling their published ages between these tie points.

*Correlation to Deccan Traps flow volumes:*

Deccan Traps flow volumes are from Richards et al. (2015), and durations of flows are from Sprain et al. (2019). Eruption rate estimates are from U-Pb dating of zircons done by Schoene et al., (2019) and are scaled linearly between the K-Pg and C30N-C29R. Correlation between these records is done using the same chron reversals and the K-Pg.

*Uncertainty in the age model:*

Correlation of data from Seymour Island to other records hinges on the assumption of continuous steady rate sedimentation in this location and other locations, if solely tied together using chron reversals and the K-Pg boundary. Future work at Seymour Island, including astronomically tuned age models, will help determine the validity of this assumption.

**Supplementary Discussion: Description of illustrative box model**

A simple numerical model of the marine Ca isotope cycle is used to constrain drivers of  $\delta^{44/40}\text{Ca}$  variation, specifically imbalances between primary input and output fluxes (Fig. 4, Fig. DR4). The model presents a simple null hypothesis for  $\delta^{44/40}\text{Ca}$  variation caused by changes in the ‘weathering flux’ relative to the ‘carbonate flux.’ Flux imbalance is hypothesized to be one of the major drivers of  $\delta^{44/40}\text{Ca}$  evolution through Earth history (DePaolo, 2004; Fantle and

DePaolo, 2005; Fantle, 2010; Fantle and Tipper, 2014; Tipper et al., 2016). Although more complex modeling—coupling to seawater carbonate chemistry and  $p\text{CO}_2$  weathering feedbacks, for example—can be done for the marine  $\delta^{44/40}\text{Ca}$  system, difficulties persist in reproducing  $\delta^{44/40}\text{Ca}$  excursions measured in carbonates because isotope fractionation mechanisms remain incompletely understood (Komar and Zeebe, 2016; Jost et al., 2016; Silva-Tamayo et al., 2018). Relative uniformity of the  $^{87}\text{Sr}/^{86}\text{Sr}$  record (Fig. 3) suggests that the weathering flux did not substantially change over the sampled interval, so in the subsequent forward model, we assume a constant weathering flux and a variable carbonate burial flux. This model is parameterized using the same fluxes and Ca isotope compositions as Du Vivier et al. (2015), but higher  $[\text{Ca}]$  values and longer residence times. This model is intended to explain horizon-to-horizon variations through changes in the  $\delta^{44/40}\text{Ca}$  composition of seawater, but not reproduce the absolute  $\delta^{44/40}\text{Ca}$  values of mollusk shell due to unknown controls on biogenic fractionation (see extended discussion below).

The forward model for the  $\delta^{44/40}\text{Ca}$  of seawater based on flux imbalances is done assuming equality of the weathering input flux ( $F_w$ ) and carbonate export flux ( $F_{carb}$ ) at 66.5 Ma.  $F_{carb}$  is then scaled by changes in carbonate weight percent ( $wt_{carb}$ ) from this point in time. For example, if  $wt_{carb}$  is reduced by 50% from the initial value (e.g., 90% to 45%), then  $F_{carb}$  is reduced by 50%. In this modeling, the initial mass of calcium in the ocean is run at the limits of estimated ranges for Late Cretaceous seawater ( $\sim 10$  to  $50$  mmol/kg, Lasaga et al., 1985; Wallmann, 2001). To create an initial steady state with a fixed  $F_w$  across the range of masses modeled here, initial  $F_{carb}$  must remain constant. In this model,  $F_{carb}$  is equivalent to the moles of Ca in the ocean ( $N_{Ca}$ ) divided by the residence time of Ca ( $\tau_{Ca}$ ), so to maintain an initial steady state any adjustment to  $N_{Ca}$  also requires an adjustment to  $\tau_{Ca}$ . We scale both by multiplying by a constant scaling factor to allow a fixed  $F_w$  for all model runs (Table DR 7). The model equations are:

$$\begin{aligned} 1) \quad \frac{dN_{Ca}}{dt} &= F_w - \frac{wt_{carb_t}}{wt_{carb_i}} * \frac{N_{Ca_t}}{\tau_{Ca}} \\ 2) \quad \frac{d(N_{Ca}\delta_{SW})}{dt} &= F_w * \delta_w - (\delta_{SW} + \Delta_C) * \frac{wt_{carb_t}}{wt_{carb_i}} * \frac{N_{Ca_t}}{\tau_{Ca}} \end{aligned}$$

where fixed variables were set using values in Table DR8. The carbonate weight percent that varies  $F_{carb}$  in the model is a loess-smoothed and interpolated record of ODP site 690 combining several data sources (O’Connell, 1990; Ehrendorfer, 1993), which is correlated into the Seymour Island timescale as outlined above. With this method,  $F_{carb}$  reduction at the K-Pg boundary is likely overestimated because indications of carbonate preservation (e.g., coarse fraction, unbroken planktic foraminifera) increase in multiple cores immediately after the boundary (Henahan et al., 2016). This occurs because  $wt_{carb}$  may have decreased in any single core, while another area could have preserved carbonate due to increased saturation of the whole ocean (Henahan et al., 2016; Luo et al., 2016; Boudreau et al., 2018). In other words, although  $wt_{carb}$  goes down in one location, alkalinity buildup in the global ocean may enhance carbonate preservation in others. Additionally, changes in  $wt_{carb}$  are sensitive to carbonate production, including biological productivity, saturation state at the seafloor, riverine runoff, and the proportion of foraminifera to coccolithophores (Henahan et al., 2016). Because of these complex

controls,  $wt_{carb}$  is likely a better flux estimator than a highly sensitive saturation state proxy (Henehan et al., 2016).

To reproduce the relative mollusk  $\delta^{44/40}\text{Ca}$  pattern by maintaining a fixed fractionation factor and allowing  $\delta^{44/40}\text{Ca}_{\text{SW}}$  to vary due to flux imbalances, substantial (4x or more) and high frequency (<200 kyr) shifts in weathering and carbonate fluxes are required. Although weathering rates may have increased somewhat through the interval (Martin and Macdougall, 1991; McArthur et al., 1998; Dessert et al., 2001; Tobin et al., 2017), it seems unlikely that either weathering or carbonate fluxes can vary by such large magnitudes over brief time spans. Moreover, the absence of variation in the measured  $^{87}\text{Sr}/^{86}\text{Sr}$  record precludes substantial changes in weathering.

Reduced aragonite export is expected during OA (Orr et al., 2005), but decreases in the proportion of aragonite-to-calcite burial drive  $\delta^{44/40}\text{Ca}_{\text{SW}}$  in the opposite direction relative to the observed record. Moreover, OA is expected to reduce fractionation for all carbonate minerals (Tang et al., 2008; Nielsen et al., 2012), which causes similar discrepancies between measured and modeled data.

### **Supplementary Discussion: Discussion of calcium isotope fractionation and biomineralization**

Mollusk carbonate offers a valuable geochemical archive because of the abundant methods available to screen shells for diagenetic alteration (Cochran et al., 2010; Witts et al., 2018). Nonetheless, biological control of Ca isotope fractionation (Gussone and Heuser, 2016) and averaging timescales of growth and shell accumulation (Kidwell, 2002; Judd et al., 2018; Linzmeier et al., 2018) add complexity to interpreting data derived from these materials.

Data presented in this paper span several temporal scales. First, the analysis of each shell averages multiple years of growth (Petersen et al., 2016). This masks any seasonal variability that might be coupled to temperature (Immenhauser et al., 2005; Steuber and Buhl, 2006; Hippler et al., 2013) or seasonal changes in the carbonate chemistry of local seawater (Kelly and Hofmann, 2013; Waldbusser and Salisbury, 2014). Second, replicate shells from the same or closely spaced stratigraphic levels demonstrate  $\delta^{44/40}\text{Ca}$  variability on the timescales of hundreds to thousands of years necessary for shell bed accumulations (Kidwell, 2002). Similarity between shells from the same horizons suggest environmental conditions that control  $\delta^{44/40}\text{Ca}$  persist over shell accumulation timescales. Third, level-to-level variability through the section represents mean changes in environmental parameters that drive  $\delta^{44/40}\text{Ca}$  across timescales of tens of thousands of years, as derived from the linear sedimentation age model.

More study of modern mollusks is needed to address Ca isotope fractionation by these organisms but placing our data in context of globally distributed proxies suggests a  $\text{CO}_2$ -linked driver. It is beyond the present dataset to determine the exact mechanism of fractionation in these mollusks, but our findings suggest investigations of covariation between carbonate saturation state and  $\delta^{44/40}\text{Ca}$  are merited. Samples from natural environments with different  $p\text{CO}_2$  and therefore carbonate saturation states may provide the best analog to changes experienced by organisms on intergenerational timescales as the K-Pg mollusks experienced. Existing datasets may be reinterpreted in this context given poor fit to temperatures (Hippler et al., 2013). Given covariation with sedimentary indicators of saturation, fractionation may mimic responses seen in abiotic precipitation experiments, at least in sign (Tang et al., 2008; Nielsen et al., 2012). The

331 mechanism of fractionation may lie in calcium transport into the extrapallial fluid (EPF).  
332 Precipitation of shell is isolated from seawater in the EPF between the shell and mantle.  
333 Mollusks regulate the pH and saturation state of EPF (Heinemann et al., 2012). Intracellular  
334 calcium channels move most of the calcium into the EPF, and they enable high, selective  
335 diffusive fluxes which are controlled by biomineralization rates (Carré et al., 2006). Other  
336 pathways, such as passive, non-selective intercellular Ca transport and active enzymatic (Ca<sup>2+</sup>-  
337 ATPase and carbonic anhydrase) pumping, may also fractionate calcium isotopes (Carré et al.,  
338 2006).

### 339 **Supplementary References:**

- 340 Barnet, J.S.K., Littler, K., Kroon, D., Leng, M.J., Westerhold, T., Röhl, U., and Zachos, J.C.,  
341 2018, A new high-resolution chronology for the late Maastrichtian warming event:  
342 Establishing robust temporal links with the onset of Deccan volcanism: *Geology*, v. 46, p.  
343 147–150, doi:10.1130/G39771.1.
- 344 Berner, E.K., and Berner, R.A., 2012, *Global Environment: Water, Air, and Geochemical Cycles*  
345 - Second Edition: Princeton University Press, 461 p.
- 346 Blättler, C.L., Henderson, G.M., and Jenkyns, H.C., 2012, Explaining the Phanerozoic Ca  
347 isotope history of seawater: *Geology*, v. 40, p. 843–846, doi:10.1130/G33191.1.
- 348 Boudreau, B.P., Middelburg, J.J., and Luo, Y., 2018, The role of calcification in carbonate  
349 compensation: *Nature Geoscience*, v. 11, p. 894, doi:10.1038/s41561-018-0259-5.
- 350 Carré, M., Bentaleb, I., Bruguier, O., Ordinola, E., Barrett, N.T., and Fontugne, M., 2006,  
351 Calcification rate influence on trace element concentrations in aragonitic bivalve shells:  
352 Evidences and mechanisms: *Geochimica et Cosmochimica Acta*, v. 70, p. 4906–4920,  
353 doi:10.1016/j.gca.2006.07.019.
- 354 Chafetz, H.S., and Reid, A., 2000, Syndepositional shallow-water precipitation of glauconitic  
355 minerals: *Sedimentary Geology*, v. 136, p. 29–42, doi:10.1016/S0037-0738(00)00082-8.
- 356 Cochran, J.K., Kallenberg, K., Landman, N.H., Harries, P.J., Weinreb, D., Turekian, K.K., Beck,  
357 A.J., and Cobban, W.A., 2010, Effect of diagenesis on the Sr, O, and C isotope  
358 composition of Late Cretaceous mollusks from the Western Interior Seaway of North  
359 America: *American Journal of Science*, v. 310, p. 69–88, doi:10.2475/02.2010.01.
- 360 Crame, J.A., Francis, J.E., Cantrill, D.J., and Pirrie, D., 2004, Maastrichtian stratigraphy of  
361 Antarctica: *Cretaceous Research*, v. 25, p. 411–423, doi:10.1016/j.cretres.2004.02.002.
- 362 Dameron, S.N., Leckie, R.M., Clark, K., MacLeod, K.G., Thomas, D.J., and Lees, J.A., 2017,  
363 Extinction, dissolution, and possible ocean acidification prior to the  
364 Cretaceous/Paleogene (K/Pg) boundary in the tropical Pacific: *Palaeogeography*,  
365 *Palaeoclimatology, Palaeoecology*, v. 485, p. 433–454, doi:10.1016/j.palaeo.2017.06.032.

DePaolo, D.J., 2004, Calcium isotopic variations produced by biological, kinetic, radiogenic and nucleosynthetic processes: *Reviews in Mineralogy and Geochemistry*, v. 55, p. 255–288, doi:10.2138/gsrmg.55.1.255.

Dessert, C., Dupré, B., François, L.M., Schott, J., Gaillardet, J., Chakrapani, G., and Bajpai, S., 2001, Erosion of Deccan Traps determined by river geochemistry: Impact on the global climate and the  $^{87}\text{Sr}/^{86}\text{Sr}$  ratio of seawater: *Earth and Planetary Science Letters*, v. 188, p. 459–474, doi:10.1016/S0012-821X(01)00317-X.

Dinarès-Turell, J., Westerhold, T., Pujalte, V., Röhl, U., and Kroon, D., 2014, Astronomical calibration of the Danian stage (Early Paleocene) revisited: Settling chronologies of sedimentary records across the Atlantic and Pacific Oceans: *Earth and Planetary Science Letters*, v. 405, p. 119–131, doi:10.1016/j.epsl.2014.08.027.

Du Vivier, A.D.C., Jacobson, A.D., Lehn, G.O., Selby, D., Hurtgen, M.T., and Sageman, B.B., 2015, Ca isotope stratigraphy across the Cenomanian–Turonian OAE 2: Links between volcanism, seawater geochemistry, and the carbonate fractionation factor: *Earth and Planetary Science Letters*, v. 416, p. 121–131, doi:10.1016/j.epsl.2015.02.001.

Ehrendorfer, T.W., 1993, Late Cretaceous (Maestrichtian) calcareous nannoplankton biogeography with emphasis on events immediately preceding the Cretaceous/Paleocene boundary [Ph.D.]: Massachusetts Institute of Technology.

Fabry, V., McClintock, J., Mathis, J., and Grebmeier, J., 2009, Ocean Acidification at High Latitudes: The Bellwether: *Oceanography*, v. 22, p. 160–171, doi:10.5670/oceanog.2009.105.

Fantle, M.S., 2010, Evaluating the Ca isotope proxy: *American Journal of Science*, v. 310, p. 194–230, doi:10.2475/03.2010.03.

Fantle, M.S., and DePaolo, D.J., 2005, Variations in the marine Ca cycle over the past 20 million years: *Earth and Planetary Science Letters*, v. 237, p. 102–117, doi:10.1016/j.epsl.2005.06.024.

Fantle, M.S., and Tipper, E.T., 2014, Calcium isotopes in the global biogeochemical Ca cycle: Implications for development of a Ca isotope proxy: *Earth-Science Reviews*, v. 129, p. 148–177, doi:10.1016/j.earscirev.2013.10.004.

Gradstein, F.M., Ogg, J.G., Schmitz, M., and Ogg, G., 2012, *The Geologic Time Scale 2012*: Elsevier, 1175 p.

Gussone, N., and Heuser, A., 2016, Biominerals and Biomaterial, *in* *Calcium Stable Isotope Geochemistry*, Berlin, Heidelberg, Springer Berlin Heidelberg, p. 111–144, doi:10.1007/978-3-540-68953-9\_4.

Hamilton, N., 1990, Mesozoic magnetostratigraphy of Maud Rise, Antarctica, *in* *Proceedings of the Ocean Drilling Program: Scientific Results*, College Station, TX, Ocean Drilling Program, v. 113, p. 255–260.

- 403 Hardie, L.A., 1996, Secular variation in seawater chemistry: An explanation for the coupled  
404 secular variation in the mineralogies of marine limestones and potash evaporites over the  
405 past 600 m.y.: *Geology*, v. 24, p. 279–283, doi:10.1130/0091-  
406 7613(1996)024<0279:SVISCA>2.3.CO;2.
- 407 Heinemann, A., Fietzke, J., Melzner, F., Böhm, F., Thomsen, J., Garbe-Schönberg, D., and  
408 Eisenhauer, A., 2012, Conditions of *Mytilus edulis* extracellular body fluids and shell  
409 composition in a pH-treatment experiment: Acid-base status, trace elements and  $\delta^{11}\text{B}$ :  
410 *Geochemistry, Geophysics, Geosystems*, v. 13, p. Q01005, doi:10.1029/2011GC003790.
- 411 Henehan, M.J., Hull, P.M., Penman, D.E., Rae, J.W.B., and Schmidt, D.N., 2016,  
412 Biogeochemical significance of pelagic ecosystem function: An end-Cretaceous case  
413 study: *Phil. Trans. R. Soc. B*, v. 371, p. 20150510, doi:10.1098/rstb.2015.0510.
- 414 Hippler, D., Witbaard, R., van Aken, H.M., Buhl, D., and Immenhauser, A., 2013, Exploring the  
415 calcium isotope signature of *Arctica islandica* as an environmental proxy using  
416 laboratory- and field-cultured specimens: *Palaeogeography, Palaeoclimatology,*  
417 *Palaeoecology*, v. 373, p. 75–87, doi:10.1016/j.palaeo.2011.11.015.
- 418 Horita, J., Zimmermann, H., and Holland, H.D., 2002, Chemical evolution of seawater during the  
419 Phanerozoic: Implications from the record of marine evaporites: *Geochimica et*  
420 *Cosmochimica Acta*, v. 66, p. 3733–3756, doi:10.1016/S0016-7037(01)00884-5.
- 421 Huber, B.T., 1988, Upper Campanian-Paleocene foraminifera from the James Ross Island  
422 region, Antarctic Peninsula, *in* *Geological Society of America Memoirs*, Geological  
423 Society of America, v. 169, p. 163–252, doi:10.1130/MEM169-p163.
- 424 Immenhauser, A., Nägler, T.F., Steuber, T., and Hippler, D., 2005, A critical assessment of  
425 mollusk  $^{18}\text{O}/^{16}\text{O}$ ,  $\text{Mg}/\text{Ca}$ , and  $^{44}\text{Ca}/^{40}\text{Ca}$  ratios as proxies for Cretaceous seawater  
426 temperature seasonality: *Palaeogeography, Palaeoclimatology, Palaeoecology*, v. 215, p.  
427 221–237, doi:10.1016/j.palaeo.2004.09.005.
- 428 Jost, A.B., Bachan, A., van de Schootbrugge, B., Brawn, S.T., DePaolo, D.J., and Payne, J.L.,  
429 2016, Additive effects of acidification and mineralogy on calcium isotopes in  
430 Triassic/Jurassic boundary limestones: *Geochemistry, Geophysics, Geosystems*, v. 18, p.  
431 113–124, doi:10.1002/2016GC006724.
- 432 Judd, E.J., Wilkinson, B.H., and Ivany, L.C., 2018, The life and time of clams: Derivation of  
433 intra-annual growth rates from high-resolution oxygen isotope profiles: *Palaeogeography,*  
434 *Palaeoclimatology, Palaeoecology*, v. 490, p. 70–83, doi:10.1016/j.palaeo.2017.09.034.
- 435 Kelly, M.W., and Hofmann, G.E., 2013, Adaptation and the physiology of ocean acidification:  
436 *Functional Ecology*, v. 27, p. 980–990, doi:10.1111/j.1365-2435.2012.02061.x.
- 437 Kidwell, S.M., 2002, Time-averaged molluscan death assemblages: Palimpsests of richness,  
438 snapshots of abundance: *Geology*, v. 30, p. 803–806, doi:10.1130/0091-  
439 7613(2002)030<0803:TAMDAP>2.0.CO;2.



- 440 Komar, N., and Zeebe, R.E., 2016, Calcium and calcium isotope changes during carbon cycle  
441 perturbations at the end-Permian: *Paleoceanography*, v. 31, p. 115–130,  
442 doi:10.1002/2015PA002834.
- 443 Lasaga, A.C., Berner, R.A., Garrels, R.M., Sundquist, E.T., and Broecker, W.S., 1985, An  
444 improved geochemical model of atmospheric CO<sub>2</sub> fluctuations Over the past 100 million  
445 years, *in* The Carbon Cycle and Atmospheric CO<sub>2</sub>: Natural Variations Archean to  
446 Present, American Geophysical Union (AGU), Geophysics Monograph, v. 32, p. 397–  
447 411, doi:10.1029/GM032p0397.
- 448 Lehn, G.O., Jacobson, A.D., and Holmden, C., 2013, Precise analysis of Ca isotope ratios  
449 ( $\delta^{44/40}\text{Ca}$ ) using an optimized  $^{43}\text{Ca}$ – $^{42}\text{Ca}$  double-spike MC-TIMS method: *International*  
450 *Journal of Mass Spectrometry*, v. 351, p. 69–75, doi:10.1016/j.ijms.2013.06.013.
- 451 Linzmeier, B.J., Landman, N.H., Peters, S.E., Kozdon, R., Kitajima, K., and Valley, J.W., 2018,  
452 Ion microprobe-measured stable isotope evidence for ammonite habitat and life mode  
453 during early ontogeny: *Paleobiology*, v. 44, p. 684–708, doi:10.1017/pab.2018.21.
- 454 Luo, Y., Boudreau, B.P., Dickens, G.R., Sluijs, A., and Middelburg, J.J., 2016, An alternative  
455 model for CaCO<sub>3</sub> over-shooting during the PETM: Biological carbonate compensation:  
456 *Earth and Planetary Science Letters*, v. 453, p. 223–233, doi:10.1016/j.epsl.2016.08.012.
- 457 Macellari, C.E., 1988, Stratigraphy, sedimentology, and paleoecology of Upper  
458 Cretaceous/Paleocene shelf-deltaic sediments of Seymour Island, *in* Geological Society  
459 of America Memoirs, Geological Society of America, v. 169, p. 25–54,  
460 doi:10.1130/MEM169-p25.
- 461 Martin, E.E., and Macdougall, J.D., 1991, Seawater Sr isotopes at the Cretaceous/Tertiary  
462 boundary: *Earth and Planetary Science Letters*, v. 104, p. 166–180, doi:10.1016/0012-  
463 821X(91)90202-S.
- 464 McArthur, J.M., Thirlwall, M.F., Engkilde, M., Zinsmeister, W.J., and Howarth, R.J., 1998,  
465 Strontium isotope profiles across K/T boundary sequences in Denmark and Antarctica:  
466 *Earth and Planetary Science Letters*, v. 160, p. 179–192, doi:10.1016/S0012-  
467 821X(98)00058-2.
- 468 Nielsen, L.C., DePaolo, D.J., and De Yoreo, J.J., 2012, Self-consistent ion-by-ion growth model  
469 for kinetic isotopic fractionation during calcite precipitation: *Geochimica et*  
470 *Cosmochimica Acta*, v. 86, p. 166–181, doi:10.1016/j.gca.2012.02.009.
- 471 O’Connell, S.B., 1990, Variations in Upper Cretaceous and Cenozoic calcium carbonate  
472 percentages, Maud Rise, Weddell Sea, Antarctica, *in* Proceedings of the Ocean Drilling  
473 Program Science Results, College Station, TX, Ocean Drilling Program, v. 113, p. 971–  
474 984.
- 475 Olivero, E.B., 2012, Sedimentary cycles, ammonite diversity and palaeoenvironmental changes  
476 in the Upper Cretaceous Marambio Group, Antarctica: *Cretaceous Research*, v. 34, p.  
477 348–366, doi:10.1016/j.cretres.2011.11.015.

- 478 Orr, J.C. et al., 2005, Anthropogenic ocean acidification over the twenty-first century and its  
479 impact on calcifying organisms: *Nature*, v. 437, p. 681, doi:10.1038/nature04095.
- 480 Petersen, S.V., Dutton, A., and Lohmann, K.C., 2016, End-Cretaceous extinction in Antarctica  
481 linked to both Deccan volcanism and meteorite impact via climate change: *Nature*  
482 *Communications*, v. 7, p. 12079, doi:10.1038/ncomms12079.
- 483 Pirrie, D., 1994, Petrography and provenance of the Marambio Group, Vega Island, Antarctica:  
484 *Antarctic Science*, v. 6, doi:10.1017/S0954102094000775.
- 485 Richards, M.A., Alvarez, W., Self, S., Karlstrom, L., Renne, P.R., Manga, M., Sprain, C.J., Smit,  
486 J., Vanderkluyzen, L., and Gibson, S.A., 2015, Triggering of the largest Deccan eruptions  
487 by the Chicxulub impact: *GSA Bulletin*, v. 127, p. 1507–1520, doi:10.1130/B31167.1.
- 488 Schoene, B., Eddy, M.P., Samperton, K.M., Keller, C.B., Keller, G., Adatte, T., and Khadri,  
489 S.F.R., 2019, U-Pb constraints on pulsed eruption of the Deccan Traps across the end-  
490 Cretaceous mass extinction: *Science*, v. 363, p. 862–866, doi:10.1126/science.aau2422.
- 491 Schoepfer, S.D., Tobin, T.S., Witts, J.D., and Newton, R.J., 2017, Intermittent euxinia in the  
492 high-latitude James Ross Basin during the latest Cretaceous and earliest Paleocene:  
493 *Palaeogeography, Palaeoclimatology, Palaeoecology*, v. 477, p. 40–54,  
494 doi:10.1016/j.palaeo.2017.04.013.
- 495 Silva-Tamayo, J.C. et al., 2018, Global perturbation of the marine calcium cycle during the  
496 Permian-Triassic transition: *GSA Bulletin*, v. 130, p. 1323–1338, doi:10.1130/B31818.1.
- 497 Sprain, C.J., Renne, P.R., Clemens, W.A., and Wilson, G.P., 2018, Calibration of chron C29r:  
498 New high-precision geochronologic and paleomagnetic constraints from the Hell Creek  
499 region, Montana: *GSA Bulletin*, v. 130, p. 1615–1644, doi:10.1130/B31890.1.
- 500 Sprain, C.J., Renne, P.R., Vanderkluyzen, L., Pande, K., Self, S., and Mittal, T., 2019, The  
501 eruptive tempo of Deccan volcanism in relation to the Cretaceous-Paleogene boundary:  
502 *Science*, v. 363, p. 866–870, doi:10.1126/science.aav1446.
- 503 Stanley, S.M., and Hardie, L.A., 1998, Secular oscillations in the carbonate mineralogy of reef-  
504 building and sediment-producing organisms driven by tectonically forced shifts in  
505 seawater chemistry: *Palaeogeography, Palaeoclimatology, Palaeoecology*, v. 144, p. 3–  
506 19, doi:10.1016/S0031-0182(98)00109-6.
- 507 Steuber, T., and Buhl, D., 2006, Calcium-isotope fractionation in selected modern and ancient  
508 marine carbonates: *Geochimica et Cosmochimica Acta*, v. 70, p. 5507–5521,  
509 doi:10.1016/j.gca.2006.08.028.
- 510 Tang, J., Dietzel, M., Böhm, F., Köhler, S.J., and Eisenhauer, A., 2008,  $\text{Sr}^{2+}/\text{Ca}^{2+}$  and  $^{44}\text{Ca}/^{40}\text{Ca}$   
511 fractionation during inorganic calcite formation: II. Ca isotopes: *Geochimica et*  
512 *Cosmochimica Acta*, v. 72, p. 3733–3745, doi:10.1016/j.gca.2008.05.033.

- 513 Tipper, E.T., Schmitt, A.-D., and Gussone, N., 2016, Global Ca Cycles: Coupling of Continental  
514 and Oceanic Processes, *in* Calcium Stable Isotope Geochemistry, Berlin, Heidelberg,  
515 Springer Berlin Heidelberg, p. 173–222, doi:10.1007/978-3-540-68953-9\_6.
- 516 Tobin, T.S., 2017, Recognition of a likely two phased extinction at the K-Pg boundary in  
517 Antarctica: Scientific Reports, v. 7, p. 16317, doi:10.1038/s41598-017-16515-x.
- 518 Tobin, T.S., Bitz, C.M., and Archer, D., 2017, Modeling climatic effects of carbon dioxide  
519 emissions from Deccan Traps volcanic eruptions around the Cretaceous–Paleogene  
520 boundary: Palaeogeography, Palaeoclimatology, Palaeoecology, v. 478, p. 139–148,  
521 doi:10.1016/j.palaeo.2016.05.028.
- 522 Tobin, T.S., and Ward, P.D., 2015, Carbon isotope ( $\delta^{13}\text{C}$ ) differences between Late Cretaceous  
523 ammonites and benthic mollusks from Antarctica: Palaeogeography, Palaeoclimatology,  
524 Palaeoecology, v. 428, p. 50–57, doi:10.1016/j.palaeo.2015.03.034.
- 525 Tobin, T.S., Ward, P.D., Steig, E.J., Olivero, E.B., Hilburn, I.A., Mitchell, R.N., Diamond, M.R.,  
526 Raub, T.D., and Kirschvink, J.L., 2012, Extinction patterns,  $\delta^{18}\text{O}$  trends, and  
527 magnetostratigraphy from a southern high-latitude Cretaceous–Paleogene section: Links  
528 with Deccan volcanism: Palaeogeography, Palaeoclimatology, Palaeoecology, v. 350–  
529 352, p. 180–188, doi:10.1016/j.palaeo.2012.06.029.
- 530 Waldbusser, G.G., and Salisbury, J.E., 2014, Ocean acidification in the Coastal Zone from an  
531 organism's perspective: Multiple system parameters, frequency domains, and habitats:  
532 Annual Review of Marine Science, v. 6, p. 221–247, doi:10.1146/annurev-marine-  
533 121211-172238.
- 534 Wallmann, K., 2001, Controls on the Cretaceous and Cenozoic evolution of seawater  
535 composition, atmospheric  $\text{CO}_2$  and climate: Geochimica et Cosmochimica Acta, v. 65, p.  
536 3005–3025, doi:10.1016/S0016-7037(01)00638-X.
- 537 Wang, S.C., and Marshall, C.R., 2004, Improved Confidence Intervals for Estimating the  
538 Position of a Mass Extinction Boundary: Paleobiology, v. 30, p. 5–18.
- 539 Westerhold, T., Röhl, U., Donner, B., McCarren, H.K., and Zachos, J.C., 2011, A complete high-  
540 resolution Paleocene benthic stable isotope record for the central Pacific (ODP Site  
541 1209): Paleoceanography, v. 26, doi:10.1029/2010PA002092.
- 542 Wilkinson, B.H., and Algeo, T.J., 1989, Sedimentary carbonate record of calcium-magnesium  
543 cycling: American Journal of Science, v. 289, p. 1158–1194,  
544 doi:10.2475/ajs.289.10.1158.
- 545 Witts, J.D., Bowman, V.C., Wignall, P.B., Alistair Crame, J., Francis, J.E., and Newton, R.J.,  
546 2015, Evolution and extinction of Maastrichtian (Late Cretaceous) cephalopods from the  
547 López de Bertodano Formation, Seymour Island, Antarctica: Palaeogeography,  
548 Palaeoclimatology, Palaeoecology, v. 418, p. 193–212, doi:10.1016/j.palaeo.2014.11.002.

549 Witts, J.D., Newton, R.J., Mills, B.J.W., Wignall, P.B., Bottrell, S.H., Hall, J.L.O., Francis, J.E.,  
550 and Alistair Crame, J., 2018, The impact of the Cretaceous–Paleogene (K–Pg) mass  
551 extinction event on the global sulfur cycle: Evidence from Seymour Island, Antarctica:  
552 *Geochimica et Cosmochimica Acta*, v. 230, p. 17–45, doi:10.1016/j.gca.2018.02.037.

553 Zhu, P., and Maccougall, J.D., 1998, Calcium isotopes in the marine environment and the  
554 oceanic calcium cycle: *Geochimica et Cosmochimica Acta*, v. 62, p. 1691–1698,  
555 doi:10.1016/S0016-7037(98)00110-0.

556 Zinsmeister, W.J., 2001, Late Maastrichtian Short-term Biotic Events on Seymour Island,  
557 Antarctic Peninsula: *The Journal of Geology*, v. 109, p. 213–229, doi:10.1086/319239.

558
