# Supplementary material
Source: publisher figshare collection journal article supplement (https://gsapubs.figshare.com/articles/dataset/_/12542186)
Supplement: Supplementary file 1 [file 1]

## Sheet: Table DR4 Ca data
Age (Ma)**	Stratigraphic Height (m)*	Sample Name	Number of Scans	δ44/40Ca (‰, SW)	Internal Precision (2SE)	Material	Class	Genus	Sr/Ca (ppm/ppm)	Mg/Ca (ppm/ppm)	Fe/Ca (ppm/ppm)	Mn/Ca (ppm/ppm)	Notes
65.6628	1129	JRB-16-0877	100	-1.64754	0.0217971	Shell	Bivalvia	Lahillia	0.00586266
65.7963	1105	JRB-16-0330	90	-1.71601	0.0232831	Shell	Bivalvia	Lahillia	0.00622822
65.8352	1098	L1430A1	100	-1.59457	0.0228267	Shell	Bivalvia	Lahillia	0.00433974
65.8352	1098	L1430A1	100	-1.57646	0.0193531	Shell	Bivalvia	Lahillia	0.00433974
65.8574	1094	JRB-16-0351	100	-1.66657	0.0236916	Shell	Bivalvia	Lahillia	0.0050045
65.9658	1074.5	JRB-16-0729	120	-1.88226	0.0211551	Shell	Bivalvia	Lahillia	0.0175558
65.9658	1074.5	JRB-16-0729	120	-1.84116	0.0197267	Shell	Bivalvia	Lahillia	0.0175558
66.0075	1067	C915A	100	-1.79154	0.0199325	Shell	Bivalvia	Cucullaea	0.00448522
66.052	1059	C1467A	90	-1.66533	0.0162022	Shell	Bivalvia	Cucullaea	0.0104813
66.052	1059	C1467A	90	-1.67269	0.0275645	Shell	Bivalvia	Cucullaea	0.0104813
66.052	1059	L1529B	120	-1.67412	0.0188934	Shell	Bivalvia	Lahillia	0.0110818
66.052	1059	L1529C	90	-1.69773	0.0207165	Shell	Bivalvia	Lahillia	0.00792173
66.052	1059	L1529C	110	-1.67081	0.0216769	Shell	Bivalvia	Lahillia	0.00792173
66.0554	1058	C477B	110	-1.73144	0.0225909	Shell	Bivalvia	Cucullaea	0.00953011
66.0554	1058	C477B	100	-1.68158	0.0190234	Shell	Bivalvia	Cucullaea	0.00953011
66.0554	1058	L477B	120	-1.75522	0.0189366	Shell	Bivalvia	Lahillia	0.0119259
66.0554	1058	L477D	108	-1.71067	0.0217412	Shell	Bivalvia	Lahillia	0.0106009
66.0554	1058	L477D	90	-1.68933	0.0247617	Shell	Bivalvia	Lahillia	0.0106009
66.0554	1058	L477D	100	-1.73946	0.0224242	Shell	Bivalvia	Lahillia	0.0106009
66.0793	1051	L1161B	120	-1.57936	0.0210624	Shell	Bivalvia	Lahillia	0.00466776
66.0793	1051	L1161Sed	120	-0.875736	0.0187131	Sediment	Sediment	Sediment	0.00287689	0.039505	0.0909032	0.013179
66.1035	1043.9	SI-11-722-A	112	-1.78244	0.0211919	Shell	Bivalvia	Lahillia	0.0374002
66.1035	1043.9	SI-11-722-Sed	97	-0.866917	0.0225351	Sediment	Sediment	Sediment	0.00464512	0.0721293	0.553087	0.0166763
66.1154	1040.4	SI-11-570-A	107	-1.59132	0.0212106	Shell	Bivalvia	Lahillia	0.0100399
66.1154	1040.4	SI-11-570-Sed	120	-0.824683	0.0186432	Sediment	Sediment	Sediment	0.00414938	0.0719225	0.490456	0.0116183
66.1174	1039.8	SI-11-624-A	120	-1.58225	0.0204722	Shell	Bivalvia	Lahillia	0.00440813
66.1174	1039.8	SI-11-624-Sed	120	-0.862542	0.0212941	Sediment	Sediment	Sediment	0.00202174	0.0290797	0.0398913	0.0212536
66.144	1032	C1184A2	120	-1.71056	0.0204013	Shell	Bivalvia	Cucullaea	0.0109365
66.1679	1025	C1517A	90	-1.89	0.03	Shell	Bivalvia	Cucullaea	0.0131727
66.1679	1025	C1517A	90	-1.88075	0.0241614	Shell	Bivalvia	Cucullaea	0.0131727
66.1846	1020.1	SI-11-528-A	99	-1.64892	0.0202878	Shell	Gastropod	Amberleya	0.00806466
66.1846	1020.1	SI-11-528-A	120	-1.63219	0.0210208	Shell	Gastropod	Amberleya	0.00806466
66.1985	1016	L1474A	90	-1.70585	0.02583	Shell	Bivalvia	Lahillia	0.00635487
66.1985	1016	L1474A	100	-1.74098	0.0190657	Shell	Bivalvia	Lahillia	0.00635487
66.2258	1008	L1516A	100	-1.57356	0.0221382	Shell	Bivalvia	Lahillia	0.00417611
66.2258	1008	L1516B	120	-1.58512	0.0210721	Shell	Bivalvia	Lahillia	0.00440633
66.2258	1008	L1516C	105	-1.6126	0.0239414	Shell	Bivalvia	Lahillia	0.00880239
66.2265	1007.8	SI-11-446-A	120	-1.65072	0.0189937	Shell	Gastropod	Amberleya	0.00885509
66.2265	1007.8	SI-11-446-A	107	-1.64827	0.0216158	Shell	Gastropod	Amberleya	0.00885509
66.2463	1002	C1174A	90	-1.76072	0.0265281	Shell	Bivalvia	Cucullaea	0.0123776
66.4146	973	1480F	120	-1.81526	0.0192844	Shell	Bivalvia	Lahillia	0.0292084				High Sr/Ca
66.4146	973	L1480C	120	-2.25121	0.020565	Shell	Bivalvia	Lahillia	0.0366697				High Sr/Ca
66.4146	973	L1480D	100	-1.76236	0.0199822	Shell	Bivalvia	Lahillia	0.00901754
66.4146	973	L1480E				Shell	Bivalvia	Lahillia	0.0461658				High Sr/Ca
66.9117	925	C757C2	120	-1.68196	0.0187217	Shell	Bivalvia	Cucullaea	0.00509677
66.9117	925	L757A	99	-1.62553	0.0214546	Shell	Bivalvia	Lahillia	0.00487154
66.9117	925	L757B	120	-1.58049	0.0235764	Shell	Bivalvia	Lahillia	0.00468612
66.9117	925	L757C	94	-1.63408	0.0195983	Shell	Bivalvia	Lahillia	0.0060556
67.3053	887	L1609	95	-1.6656	0.0245	Shell	Bivalvia	Lahillia	0.00625213
67.616	857	C1555B	100	-1.67795	0.021994	Shell	Bivalvia	Cucullaea	0.00572165
	Danian	L1134A				Shell	Bivalvia	Lahillia	0.0242844
**Age model for this paper outlined in the supplemental discussion. Uses revised ages from Sprain et al., 2018
*Stratigraphic heights are from Zinsmeister (2001) plane projection. See supplemental information for more discussion.
